# Supplementary figures and images for: Disengagement From Early Intervention Services for Psychosis: A Systematic Review
Source: Atypon-hosted journal article supplement (doi:10.1176/appi.ps.201900375), 2020-11-25

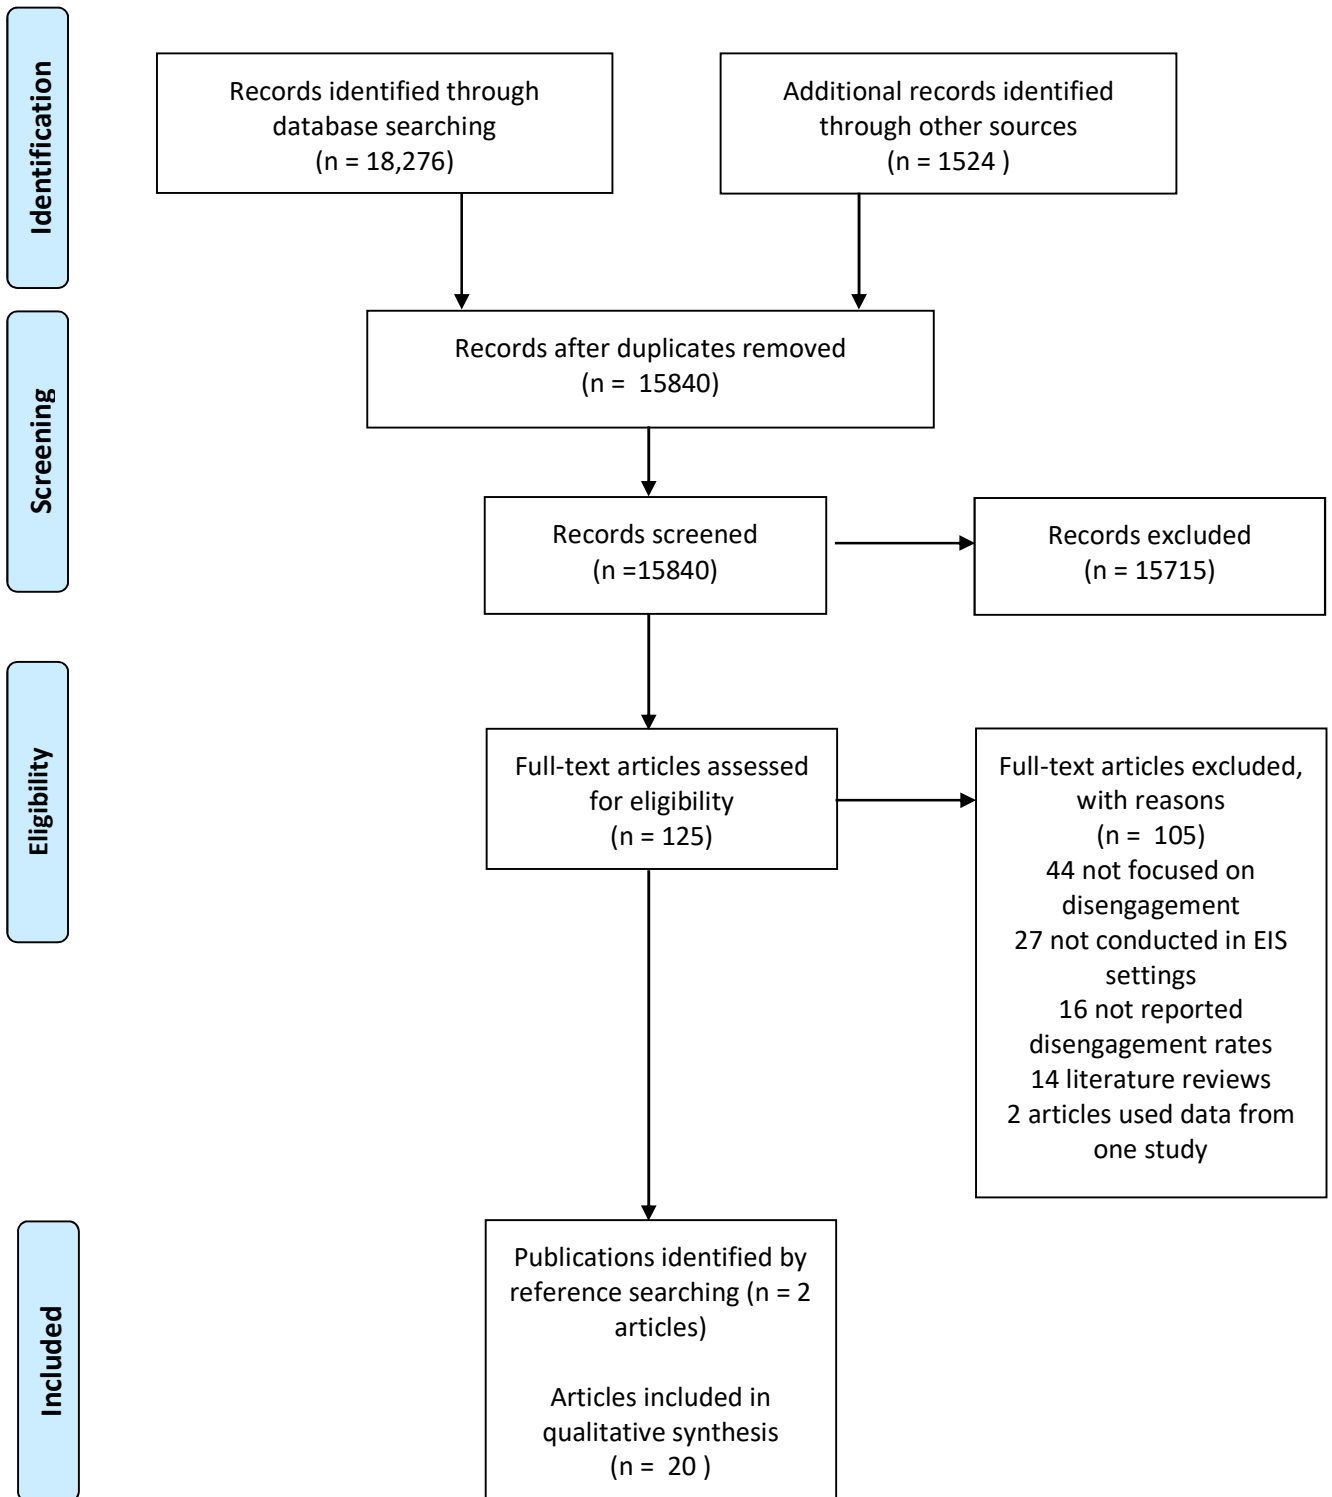

Supplement: appi.ps.201900375.ds001.pdf [file appi.ps.201900375.ds001.pdf]
